# Supplementary material for: Fast-evolving noncoding sequences in the human genome
Source: Springer Nature journal article supplement (doi:10.1186/gb-2007-8-6-r118), 2007-06-19

## Figure S1 - Patterns and levels of nucleotide variation in ANCs, comparison to alternatively defined fast evolving CNCs.

**(A)** The comparative DAF spectra for phase II HapMap SNPs in non-accelerated CNCs ( $n = 48,811$ ), ANCs ( $n = 682$ ), ANCs outside of SDs, CNVs, retroposed genes or pseudogenes ( $n = 610$ ), in the two controls ( $n = 28,408$  and  $n = 28,722$ ) in the *power CNCs* ( $n = 10,882$ ), in the HARs from Pollard et al. ( $n = 84$ ), and in the accelerated CNSs of Prabhakar et al. ( $n = 328$ ) in the 60 individuals of the Yoruban (YRI) population.

**(B)** The comparative distributions of  $F_{ST}$  values for all phase II HapMap SNPs in ANCs ( $n = 688$ ), ANCs outside of SDs, CNVs, retroposed genes or pseudogenes ( $n = 620$ ), *power CNCs* ( $n = 11,267$ ), non-accelerated CNCs ( $n = 52,210$ ), HARs ( $n = 82$ ) and accelerated CNSs ( $n = 340$ ).

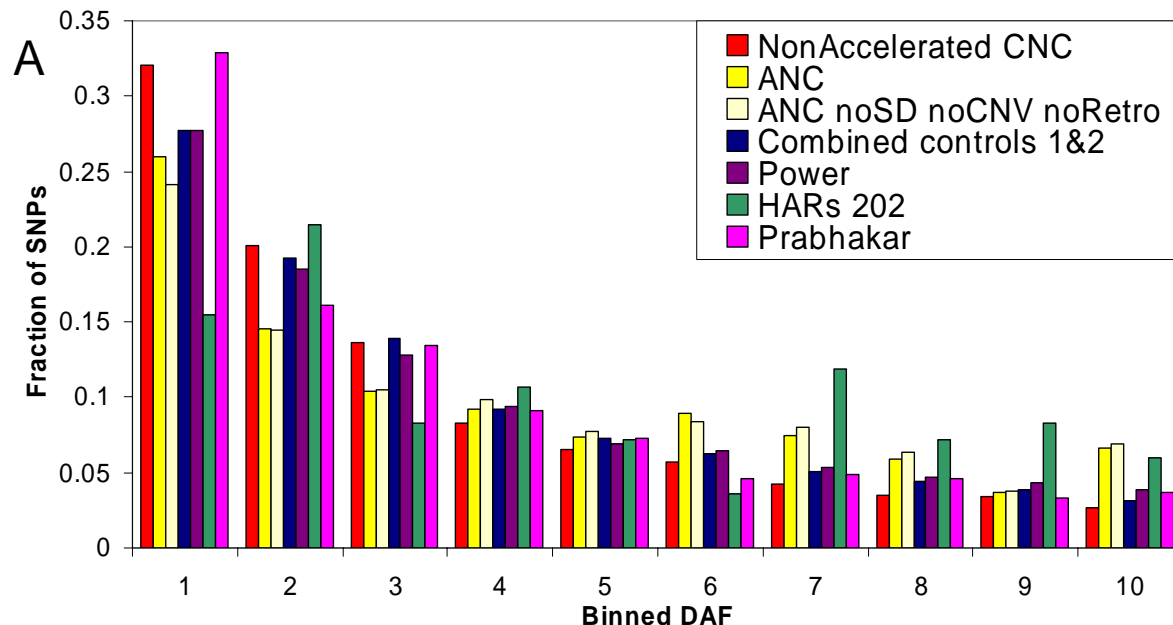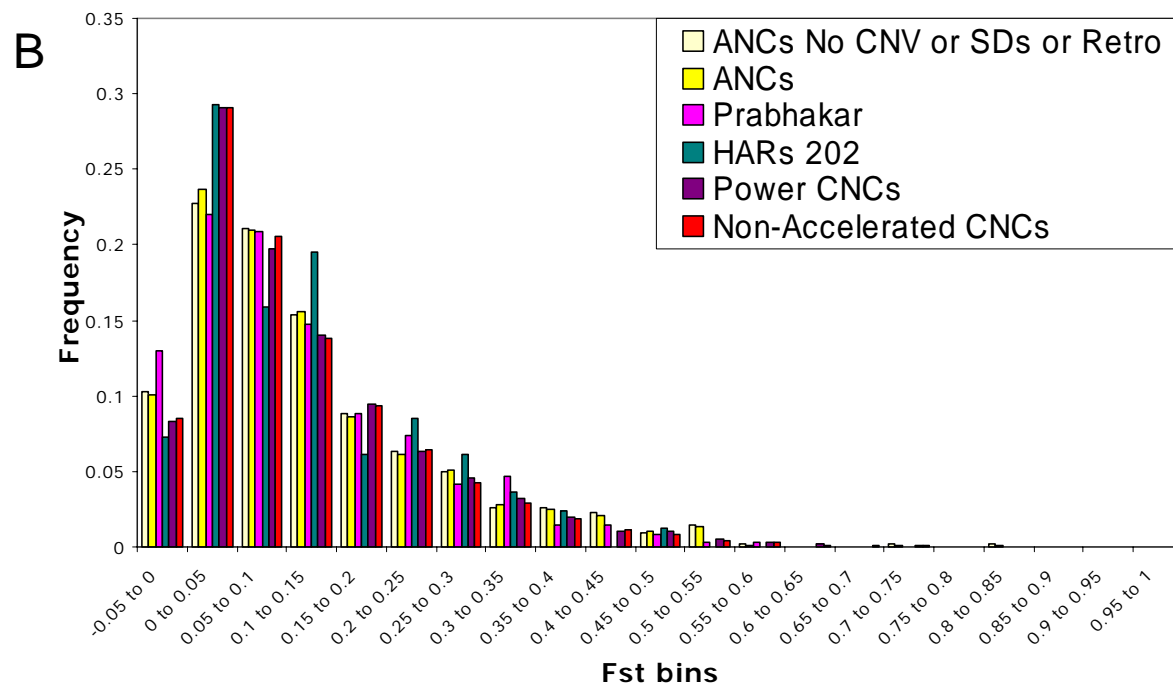

Supplement: 13059_2006_1599_MOESM2_ESM.pdf [file 13059_2006_1599_MOESM2_ESM.pdf]
